# Supplementary material
Source: Research Square preprint supplement (doi:10.21203/rs.3.rs-9057090/v1)

Von Mises


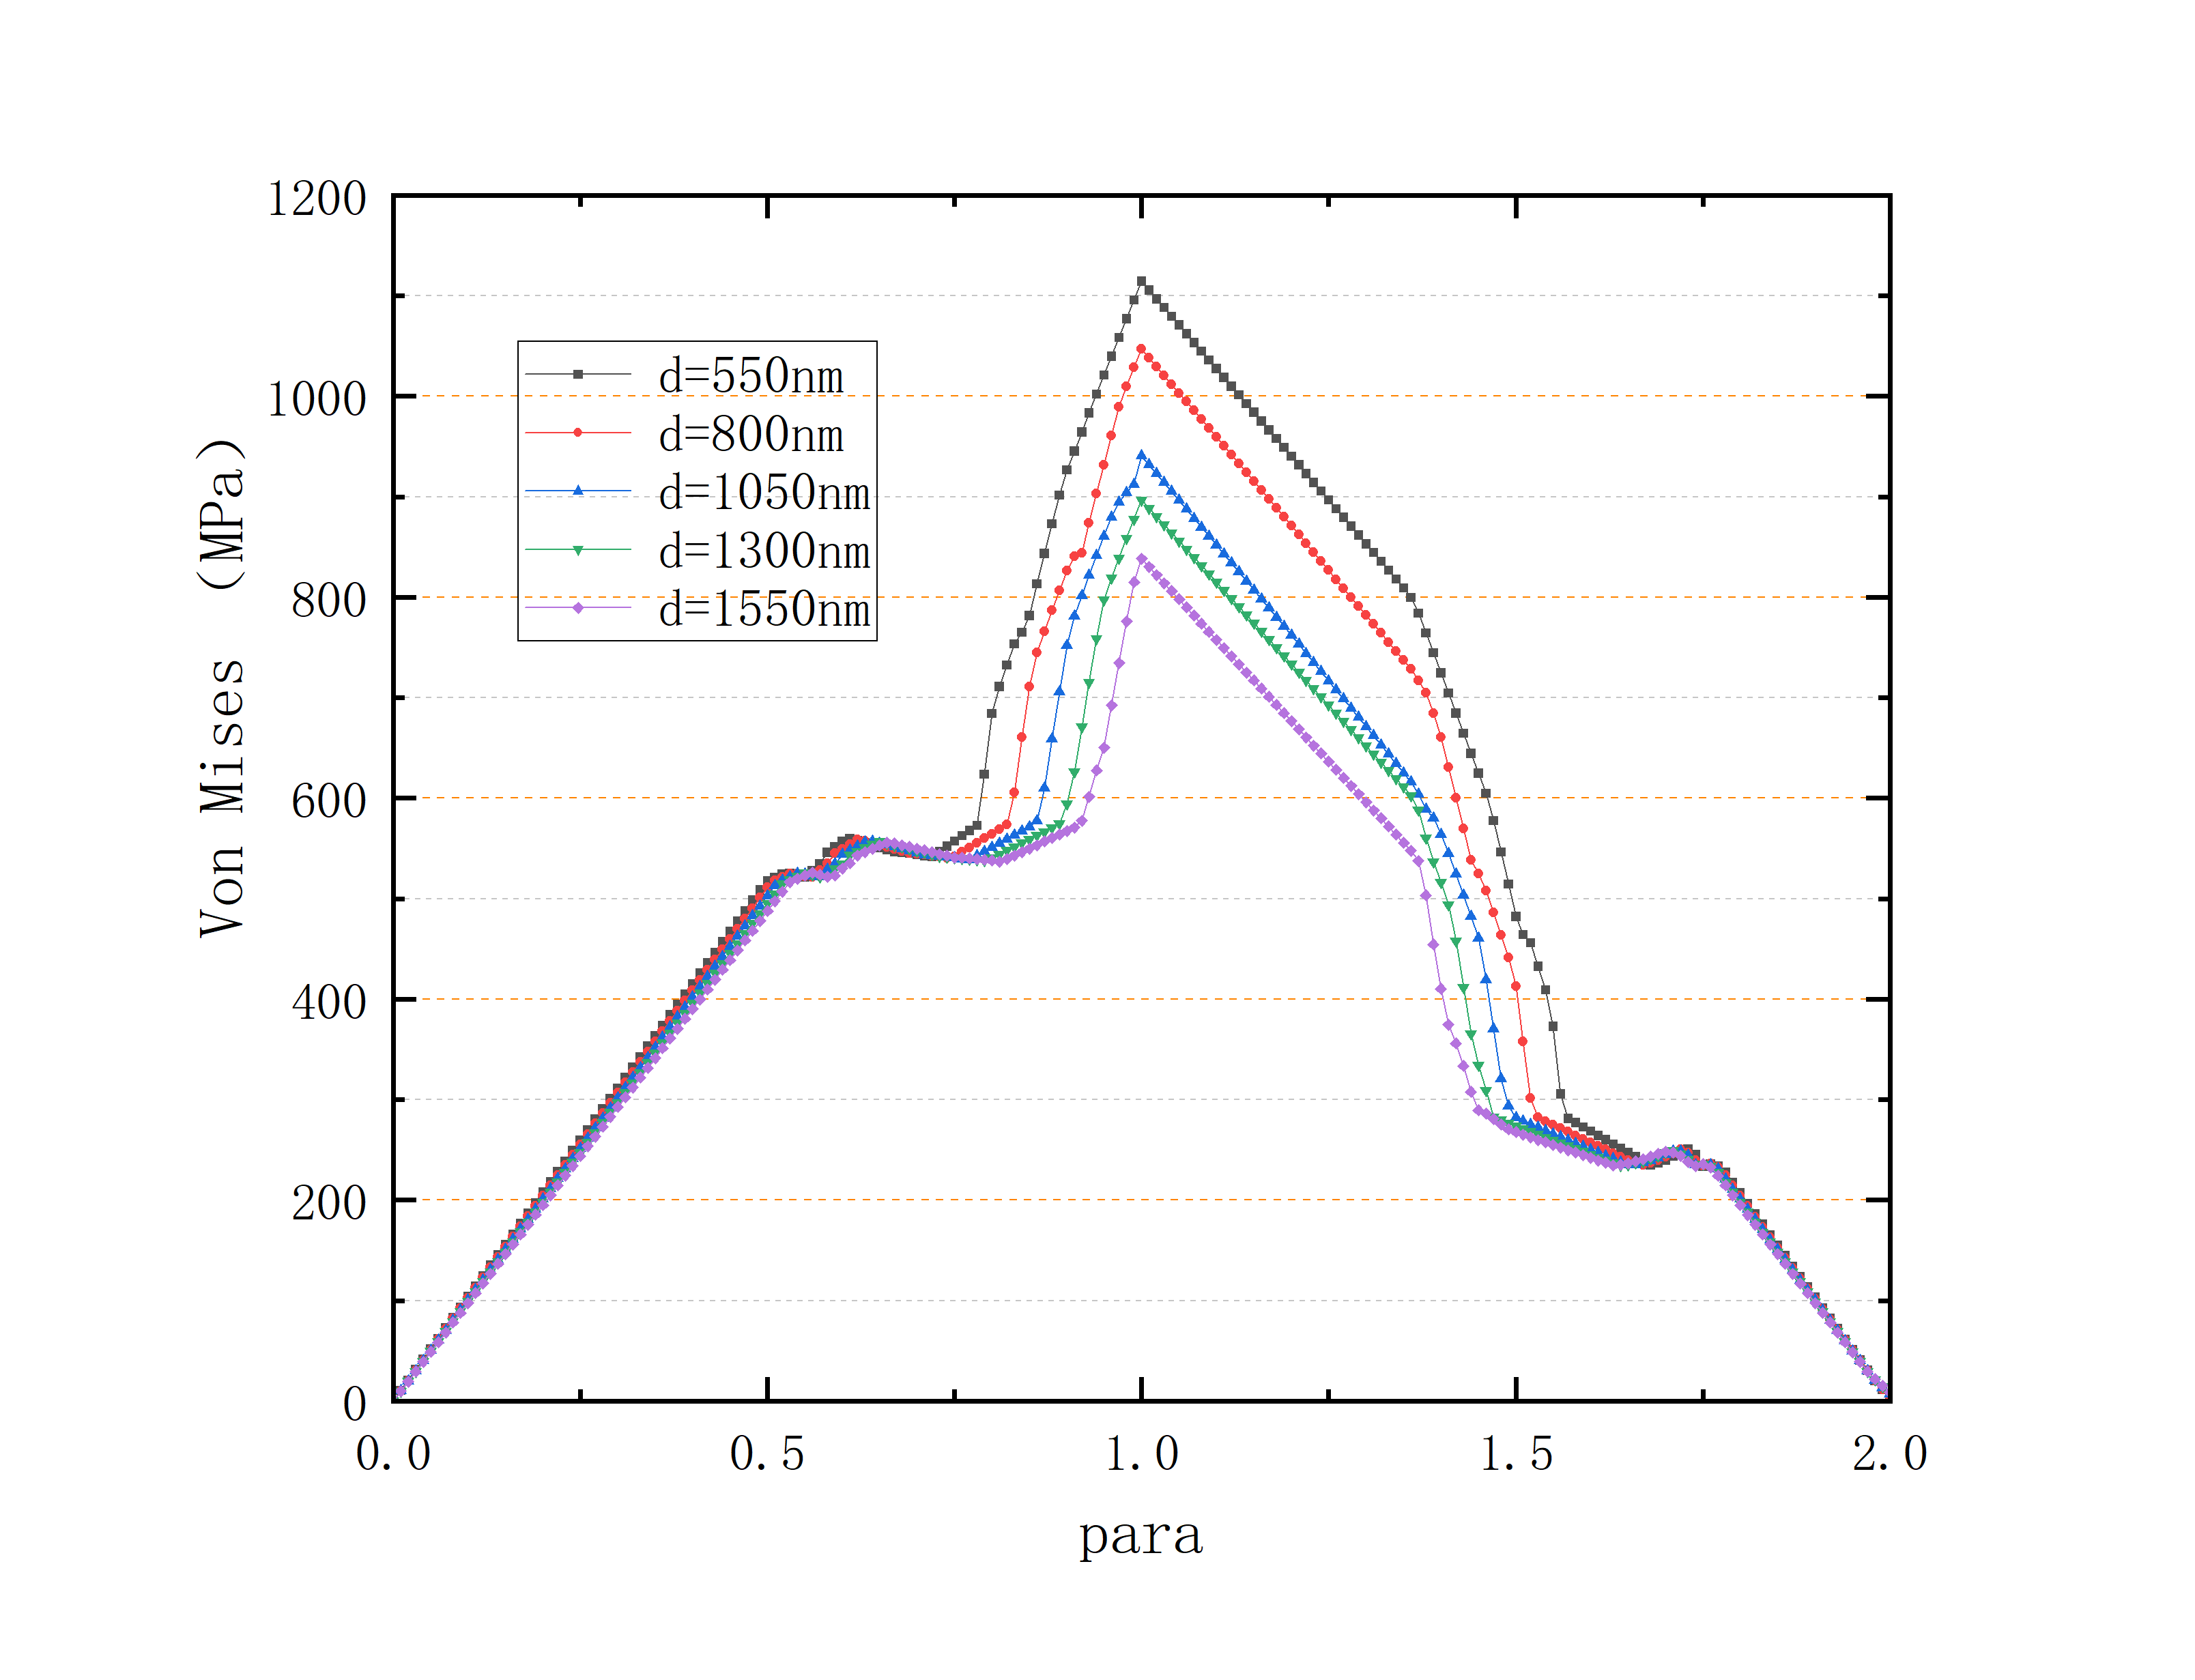
r=0.18inch
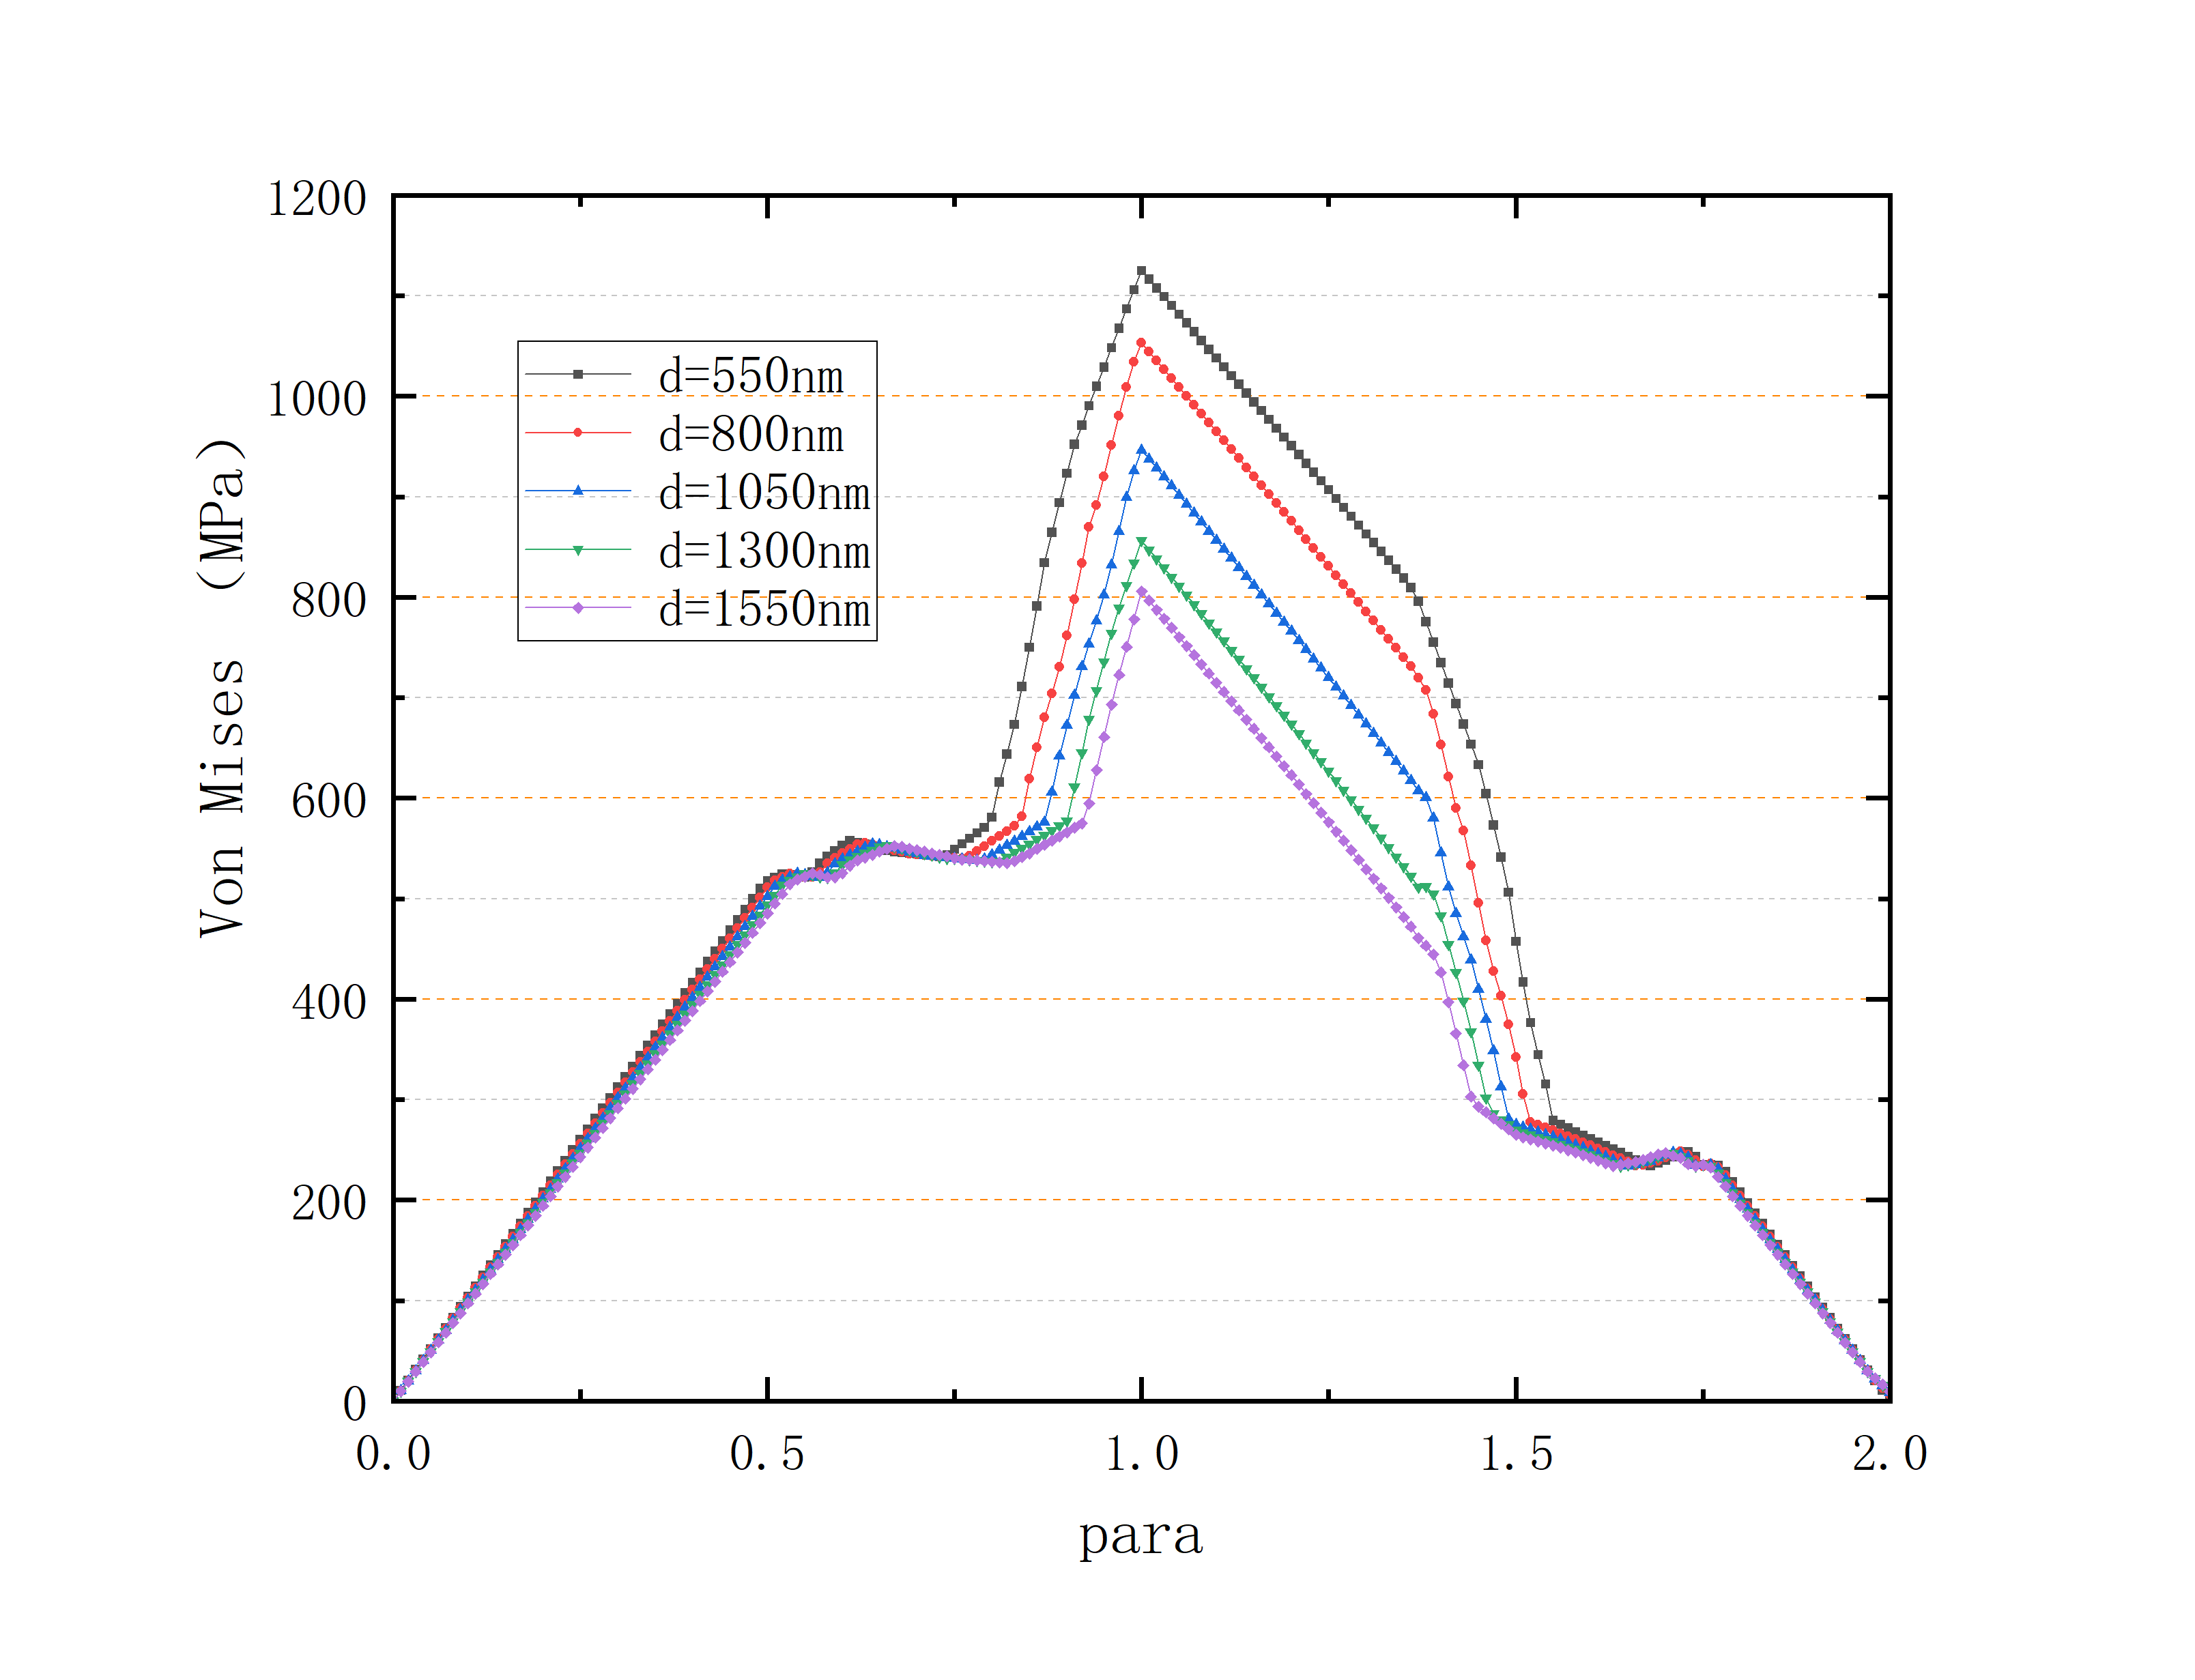
r=0.16inch
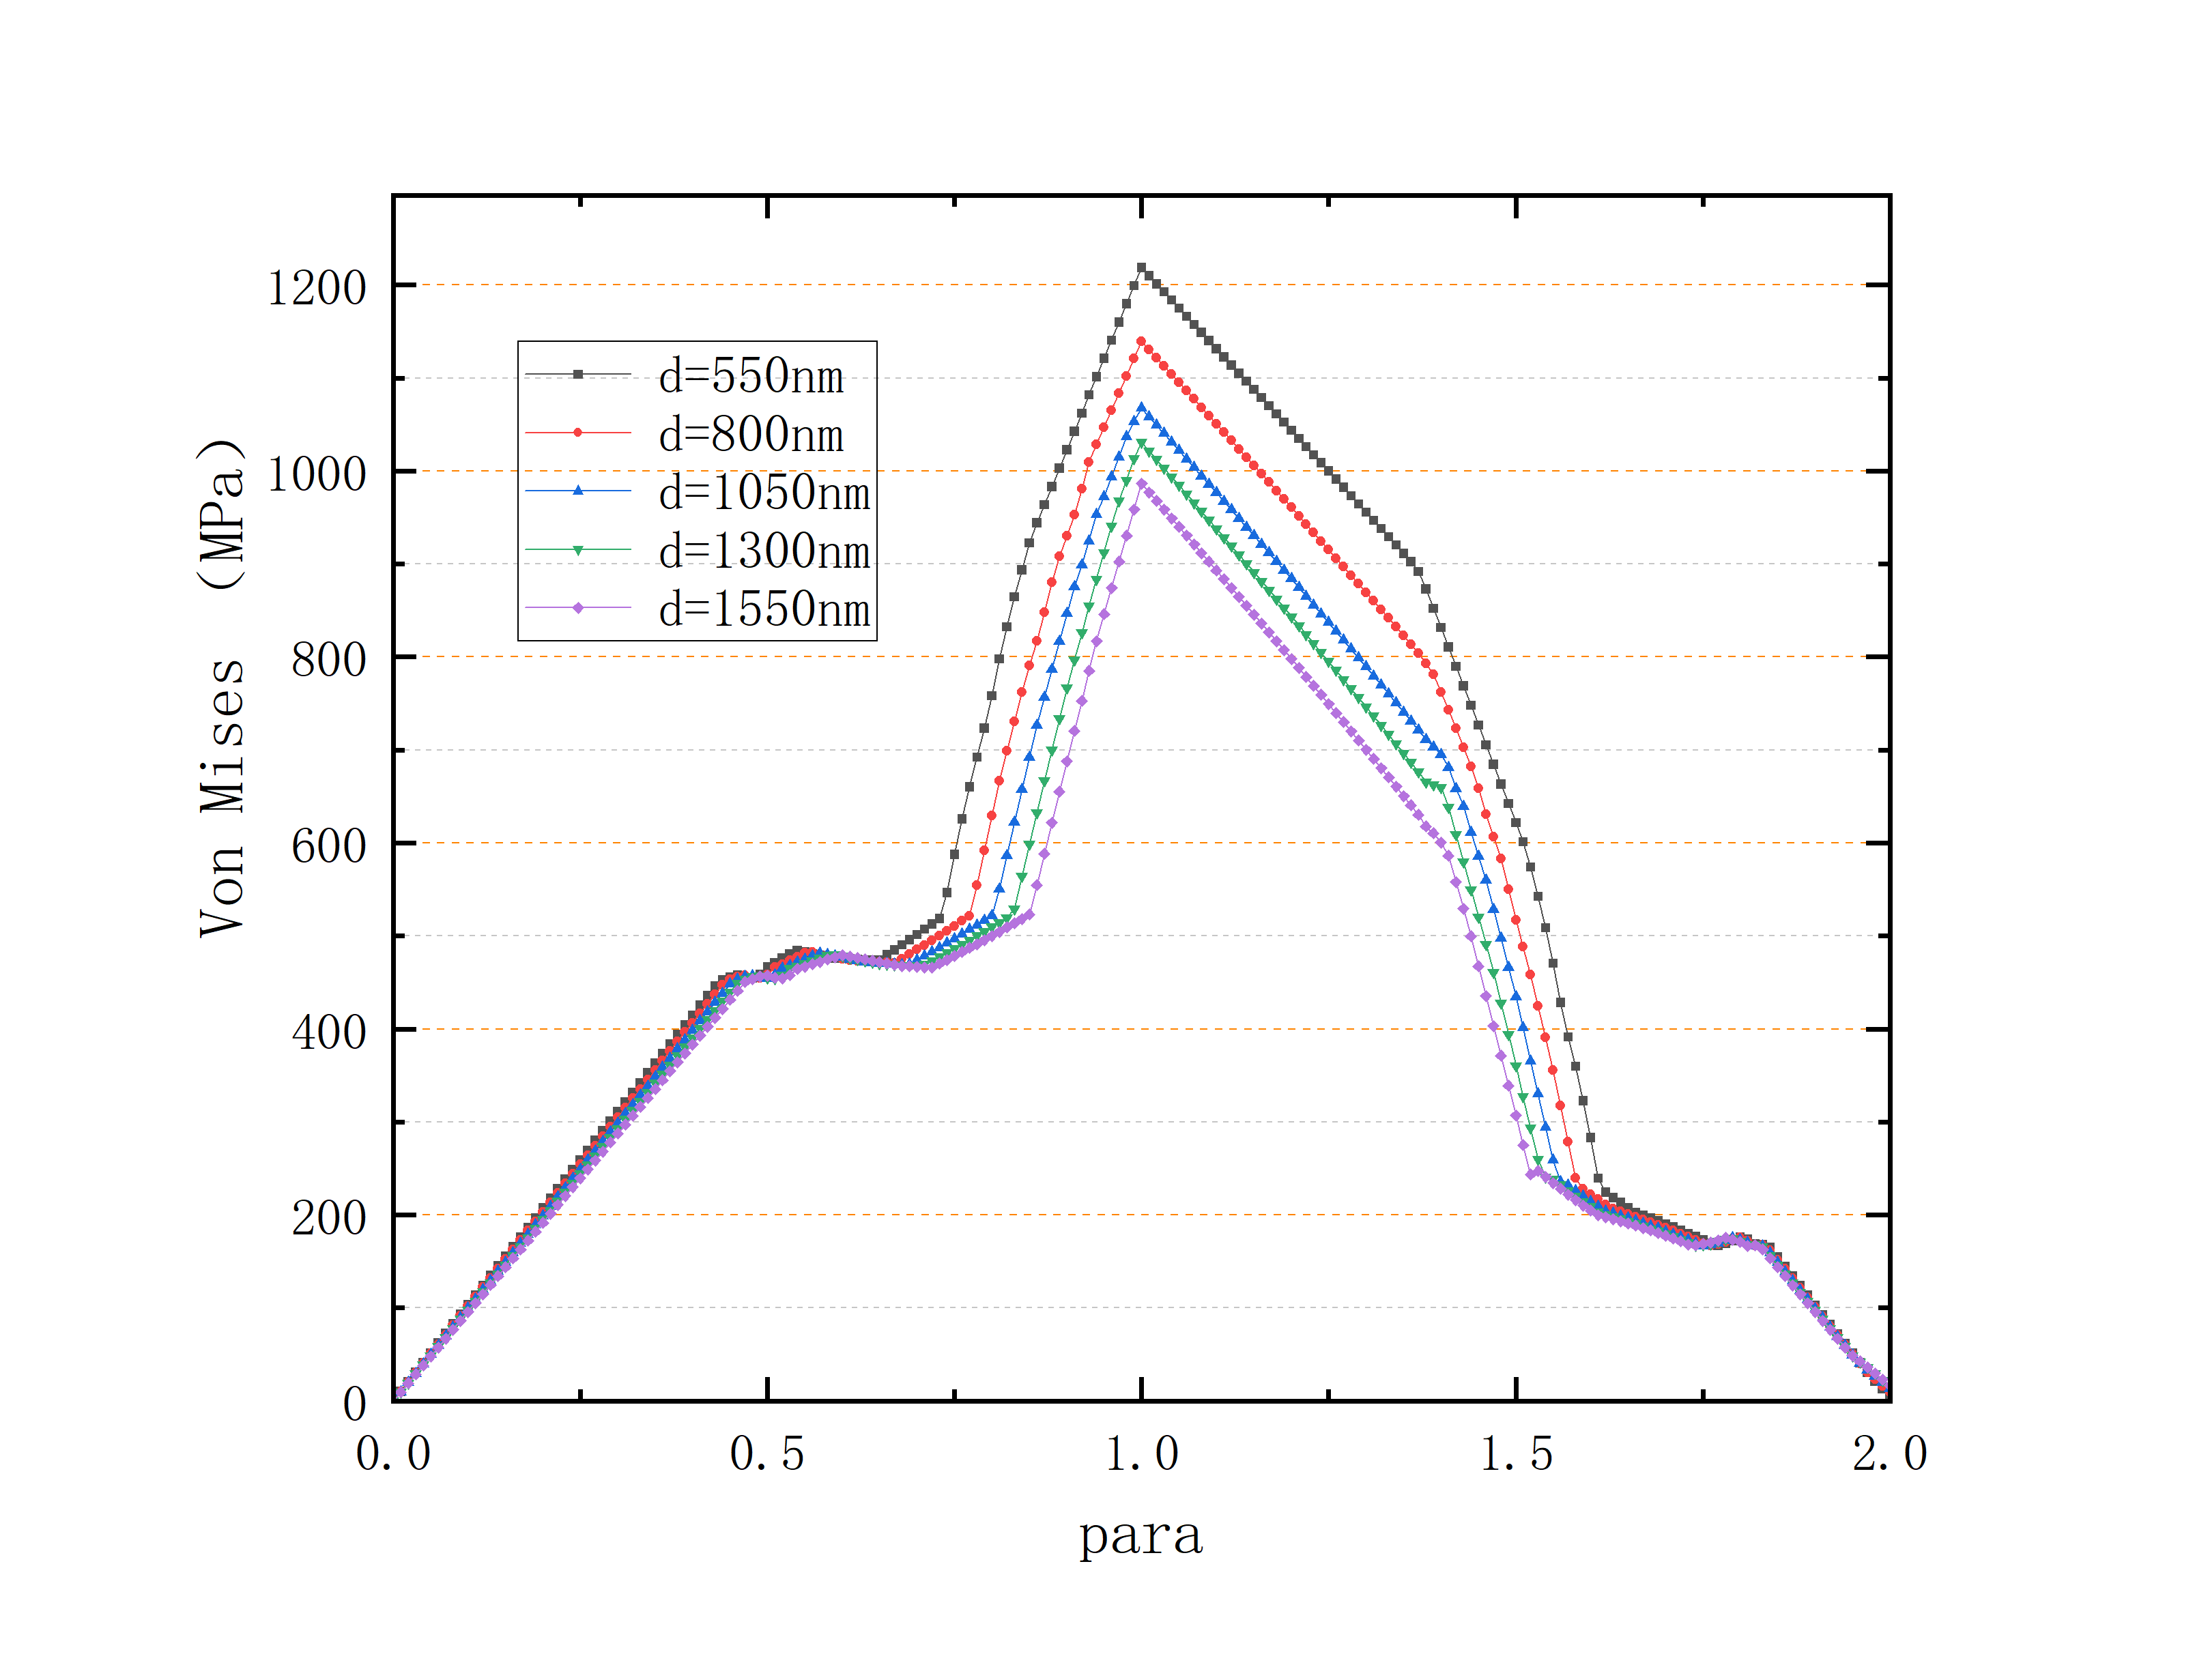
 r=0.14inch

Axial Displacement


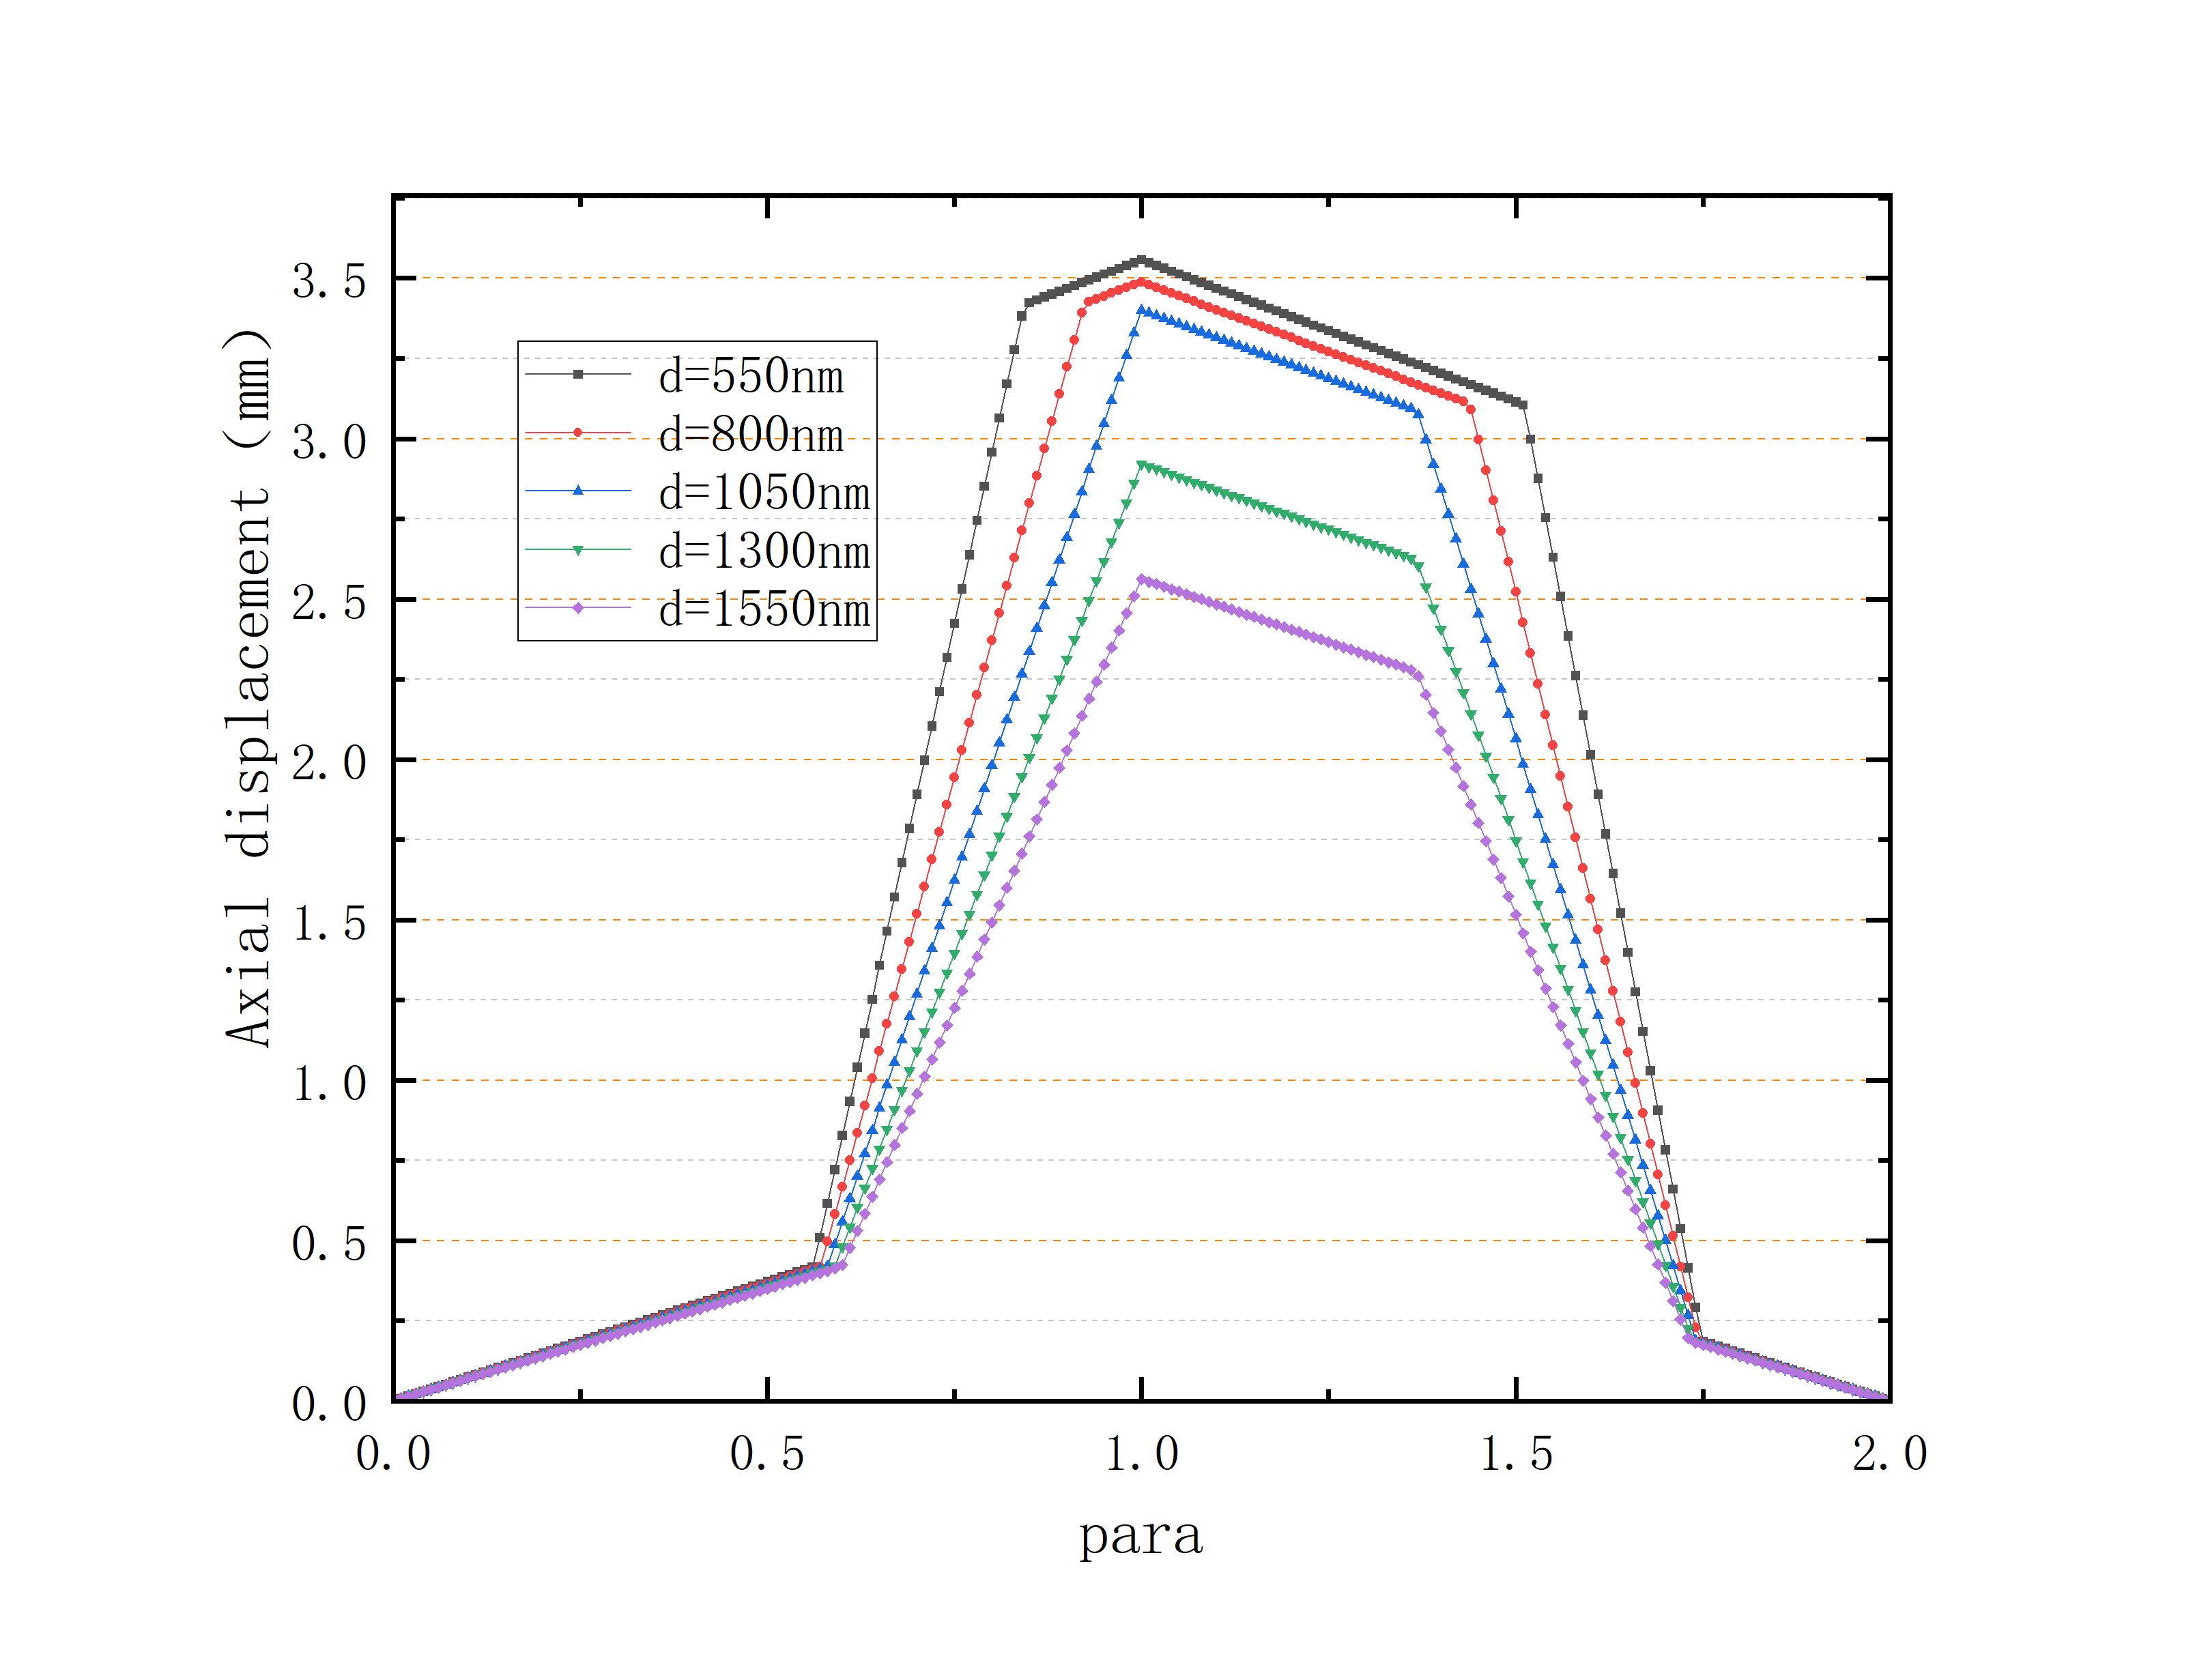
r=0.18inch
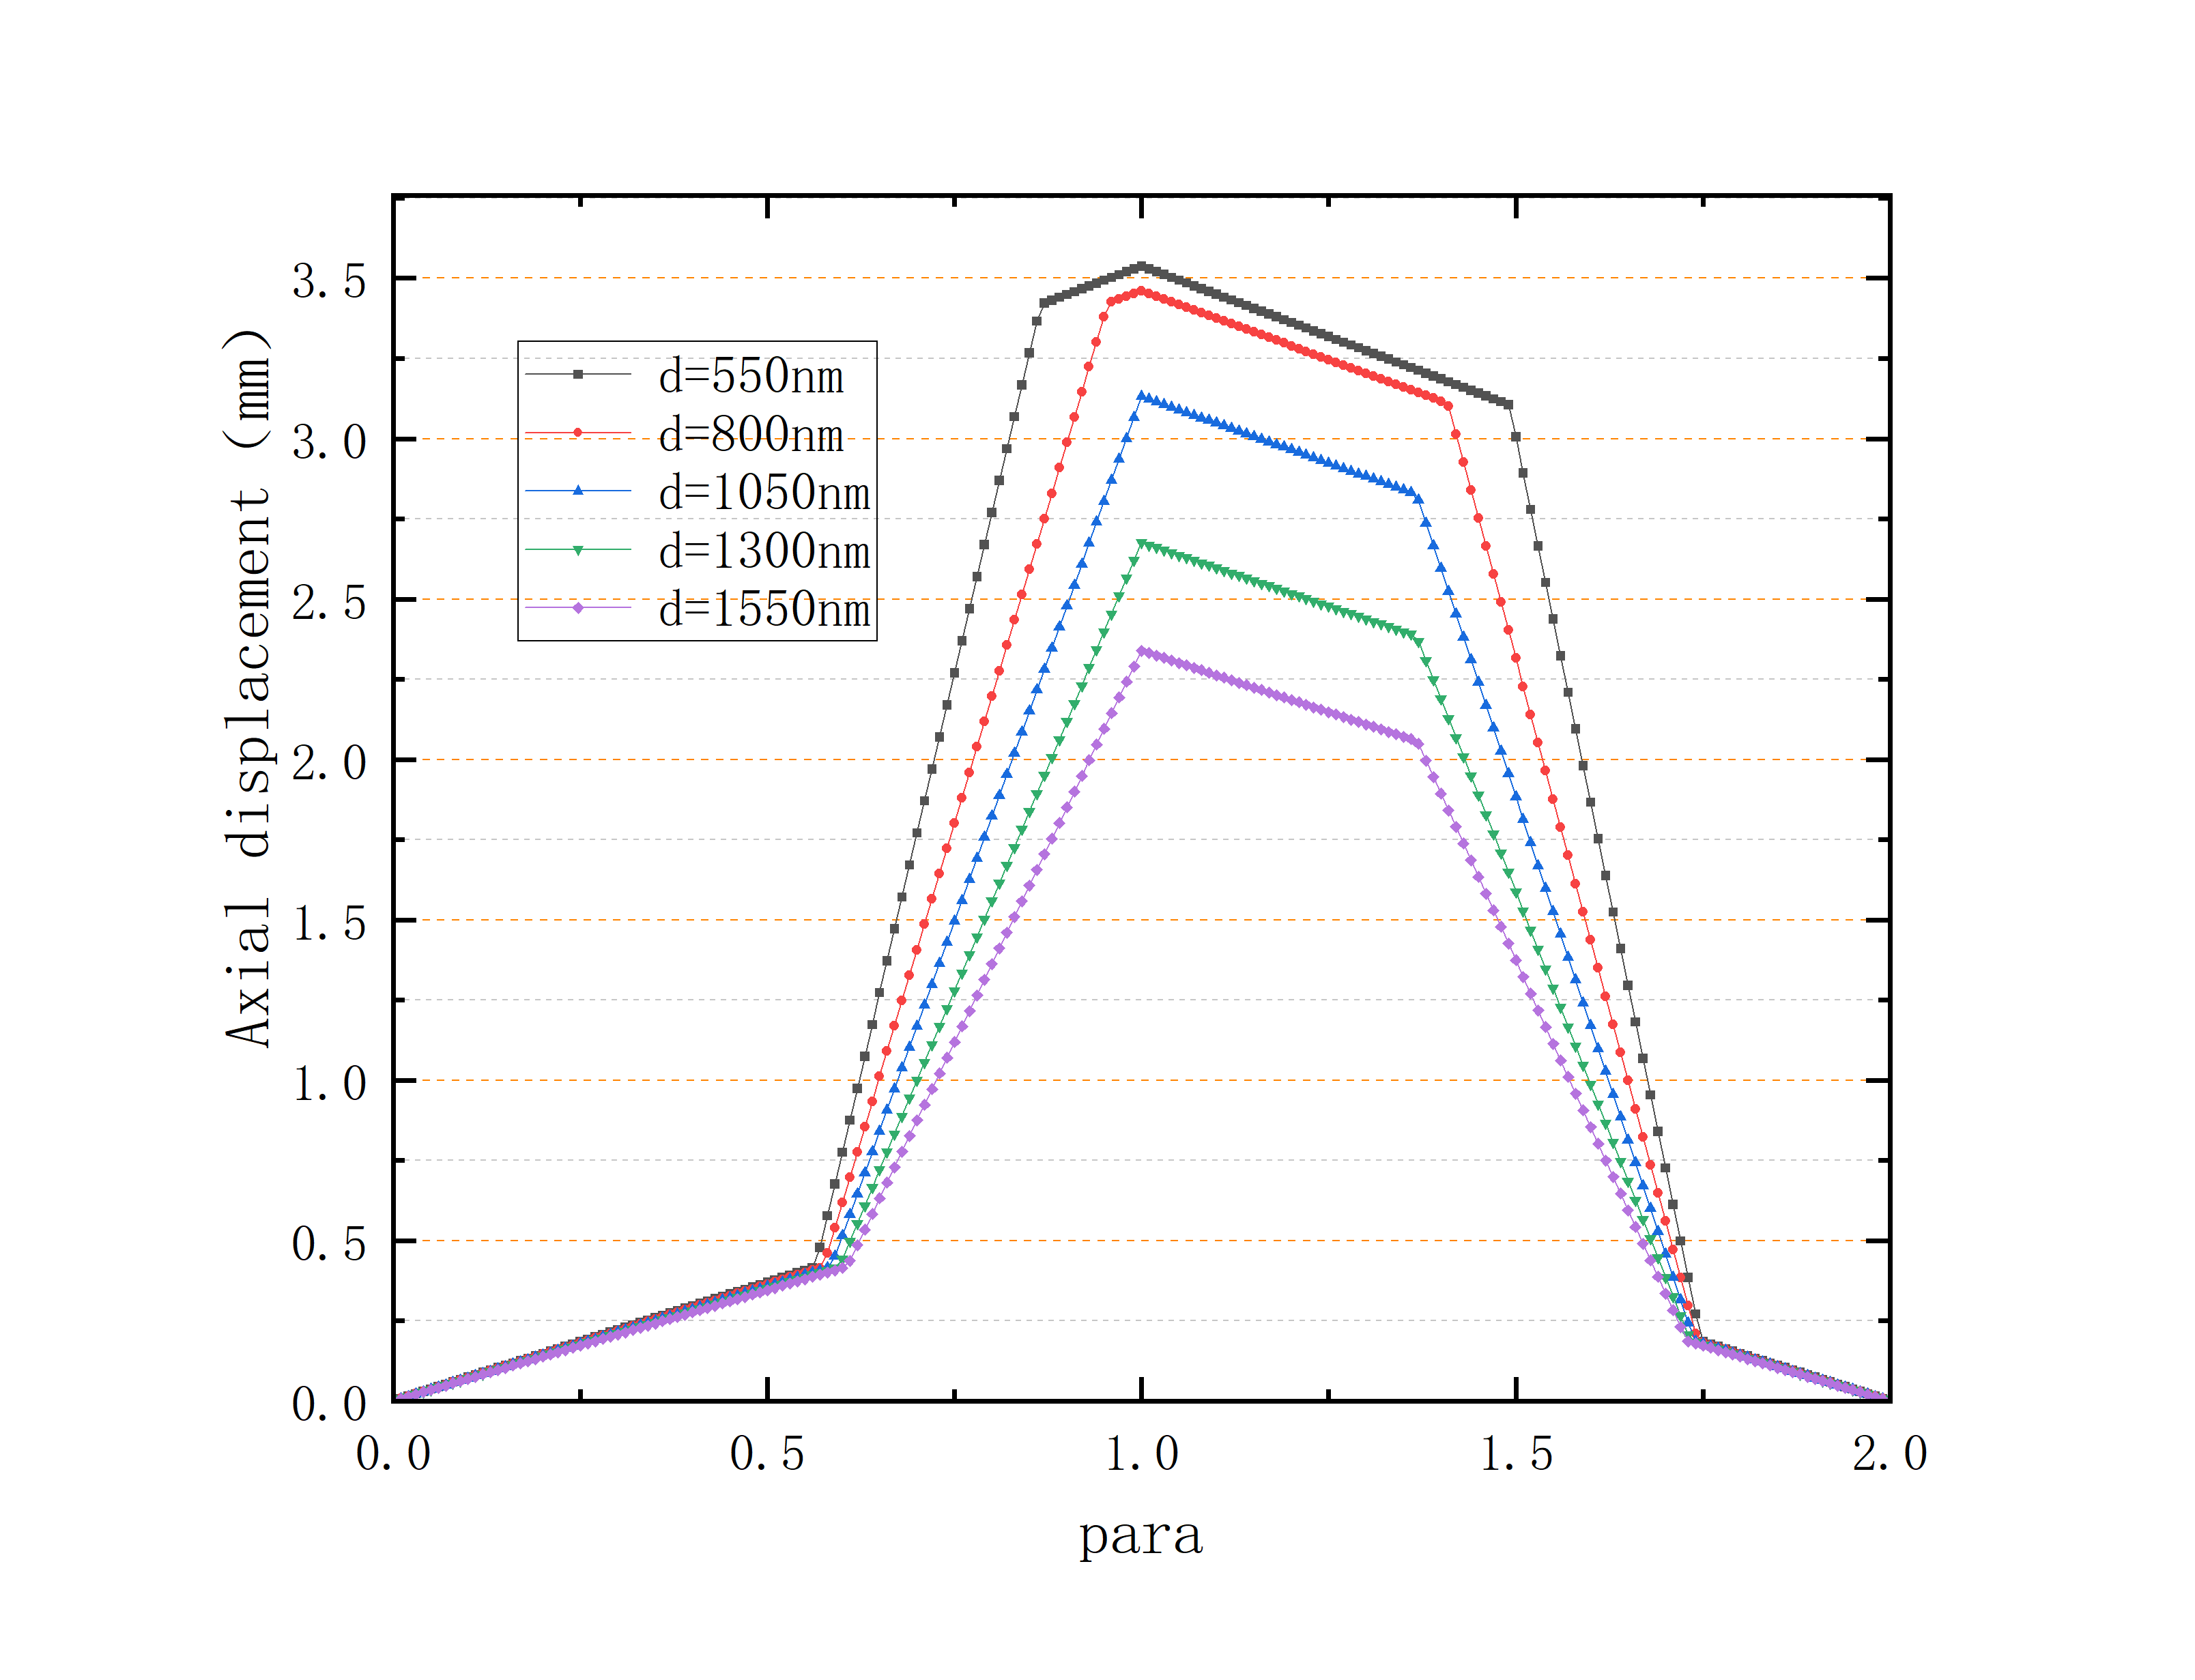
r=0.16inch
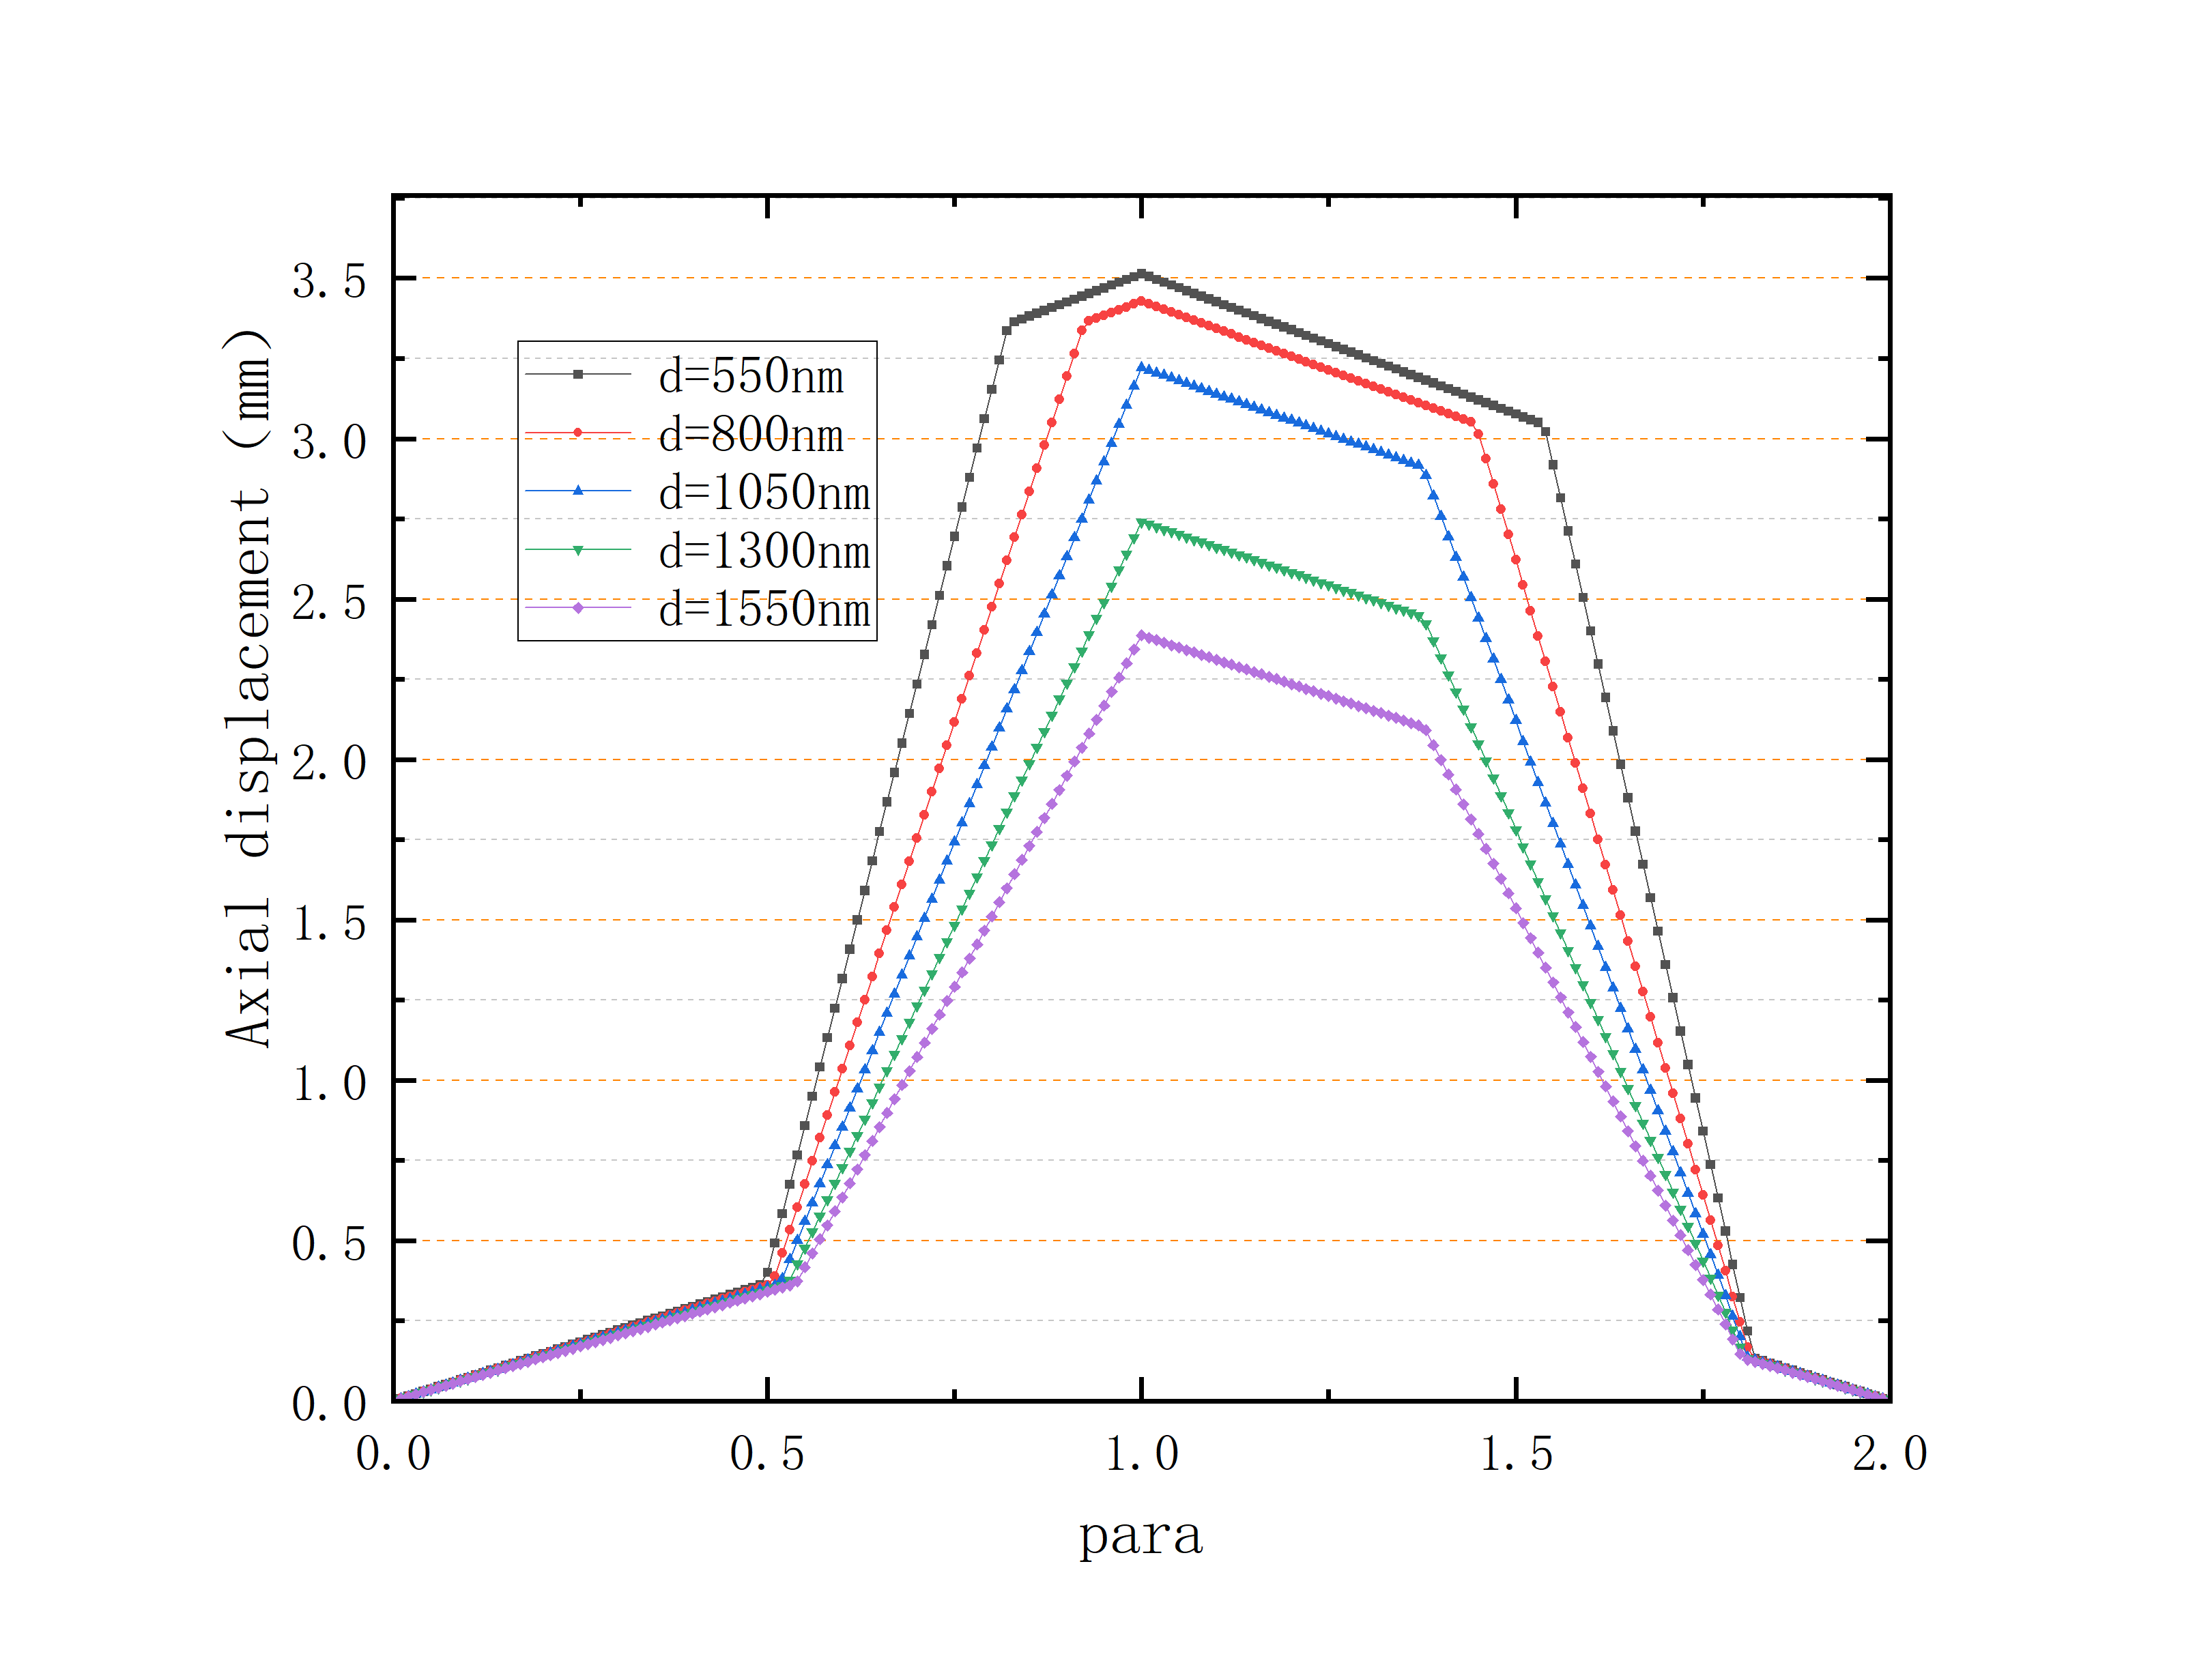
 r=0.14inch

Equivalent partial strain

d=1500nm

Left: 0.5mm,Right: 2.5mm


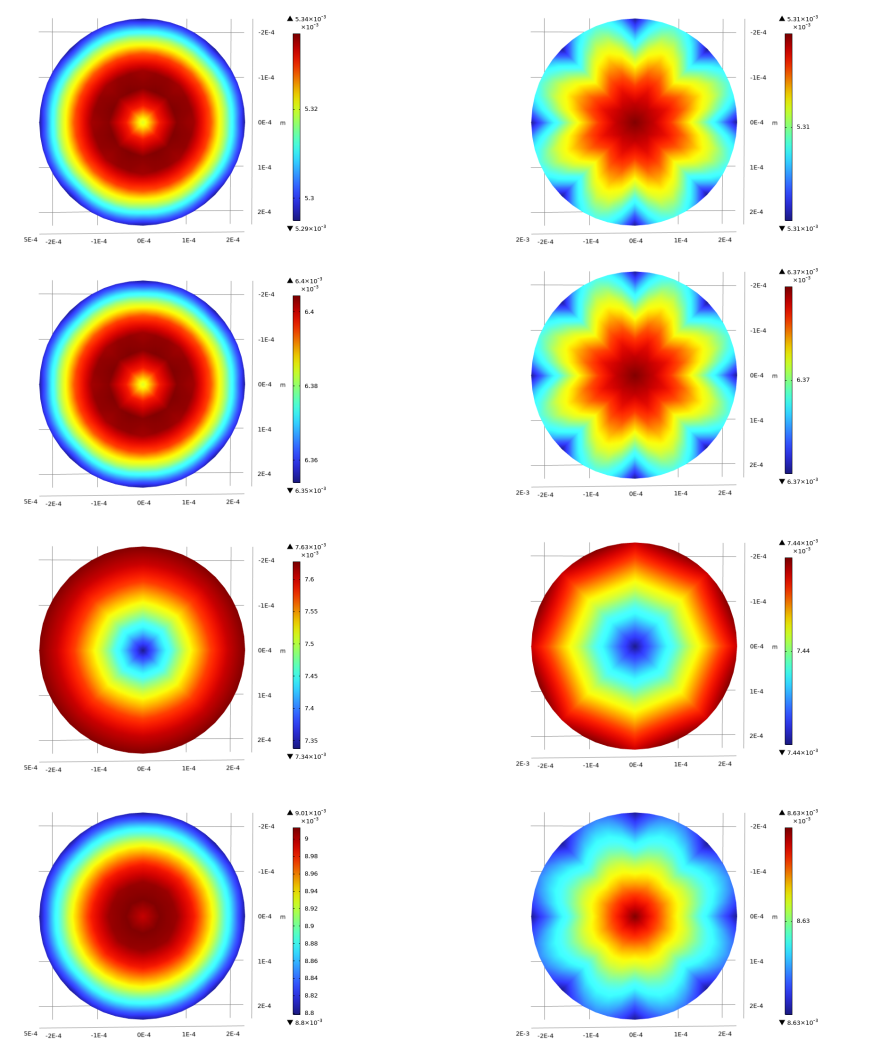


d=1050nm

Left: 0.5mm, Right: 2.5mm


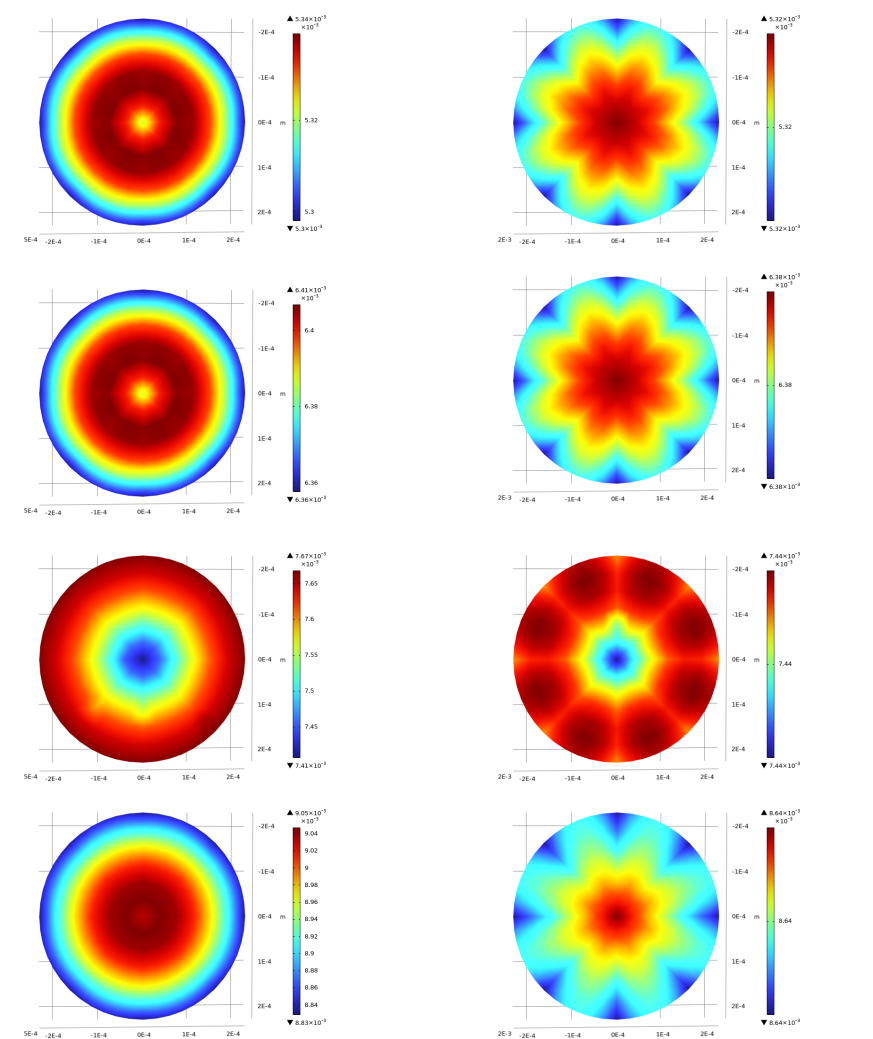


d=800nm

Left: 0.5mm, Right: 2.5mm


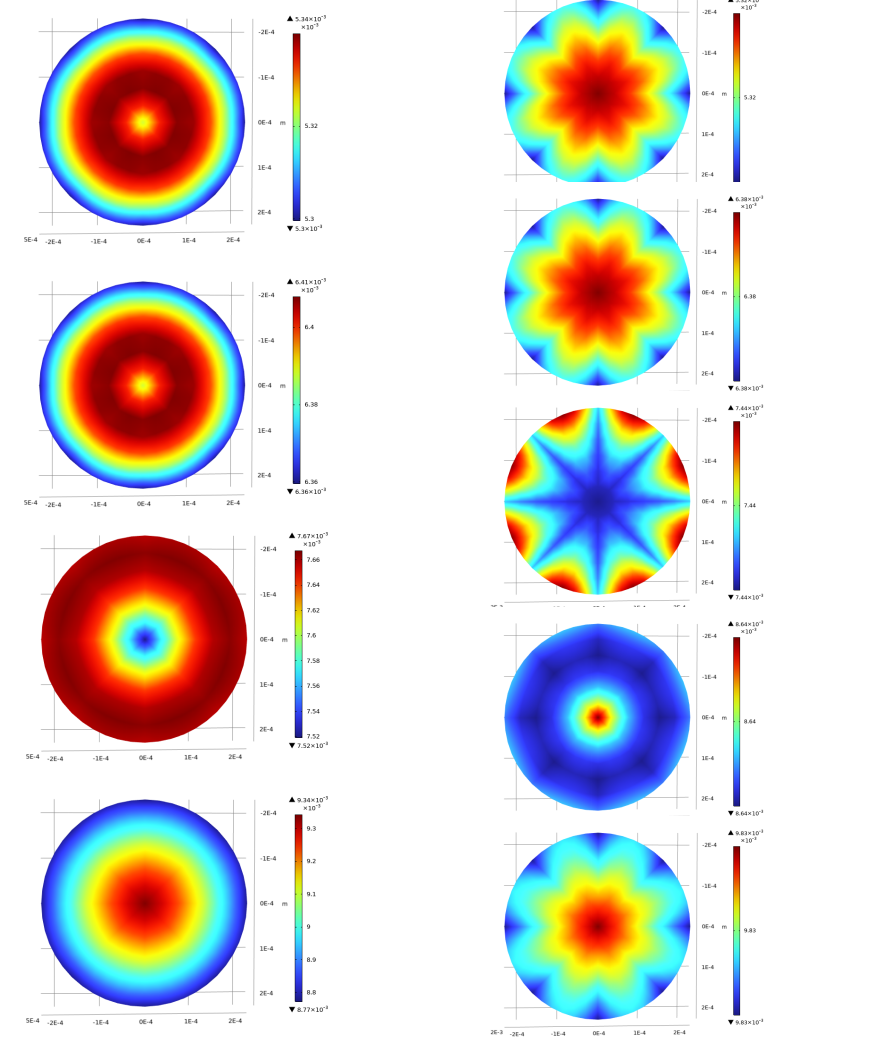

Supplement: Supplementary file 1 [file 39bc6ad1ad05dcf04d9edfc2.docx]
